# Supplementary material for: Enhancing the sensitivity of nanobodies through covalent and non-covalent polymerization
Source: Royal Society of Chemistry journal article supplement (doi:10.1039/d5ra03619d), 2026-01-01
Supplement: d5ra03619d2.pdf [file d5ra03619d2.pdf]

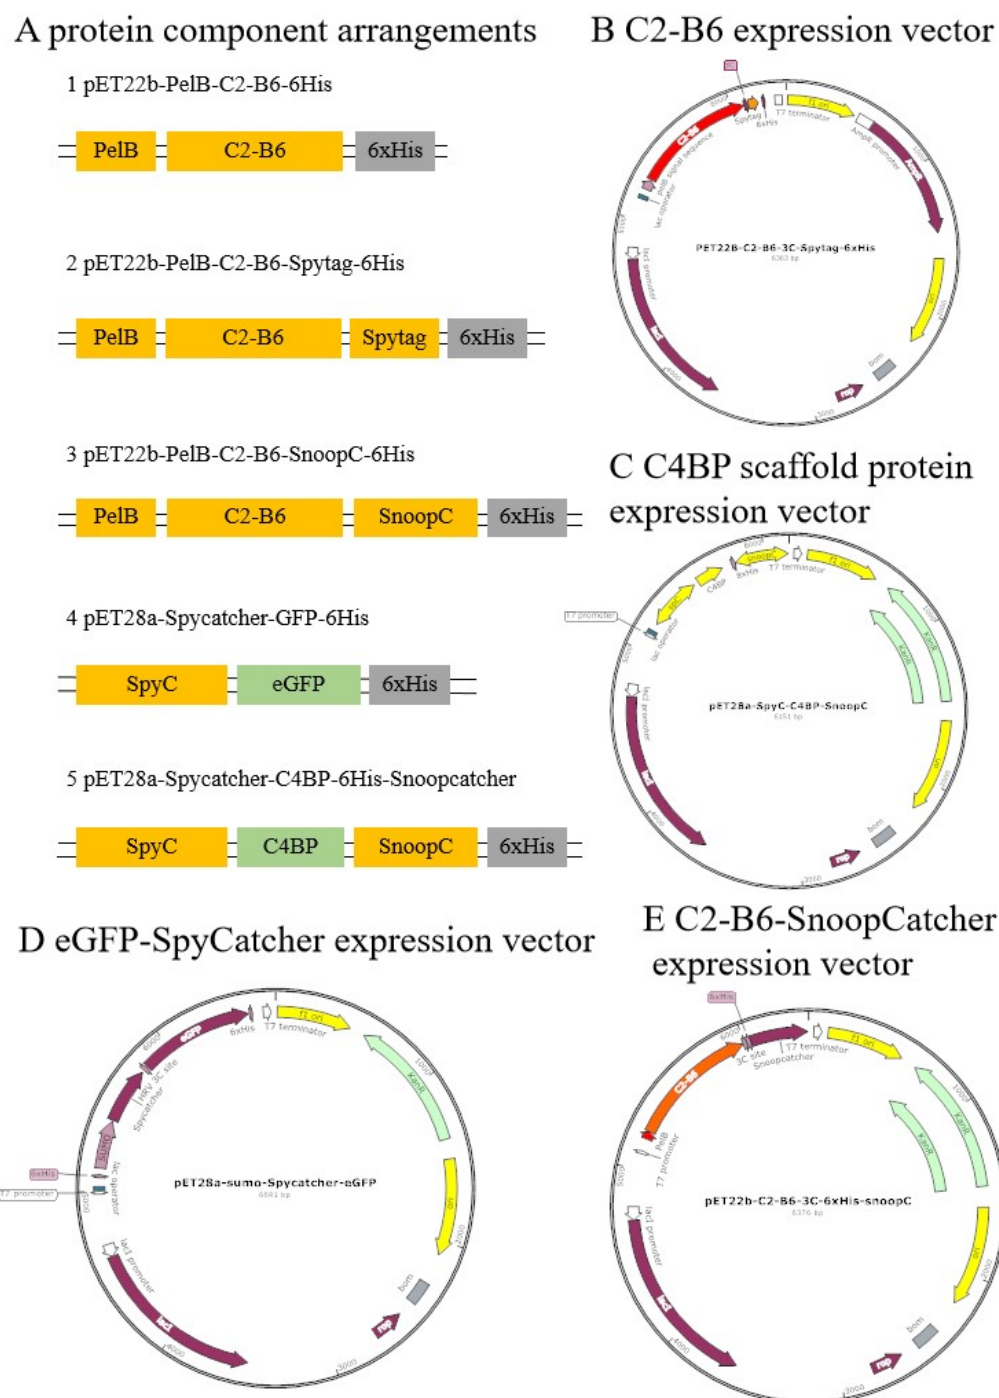

1  
2 Figure S1. Construct schematics and protein sequences. (A) Schematic diagrams of the protein  
3 component arrangements. (B) C2-B6 expression vector. (C) SpyCatcher-C4BP-SnoopCatcher with  
4 8xHis tag expression vector. (D) eGFP-SpyCatcher expression vector. (E) C2-B6-SnoopCatcher  
5 expression vector for magnetic beads capture and biotinylation.

6  
7

## A Monomer nanobodies

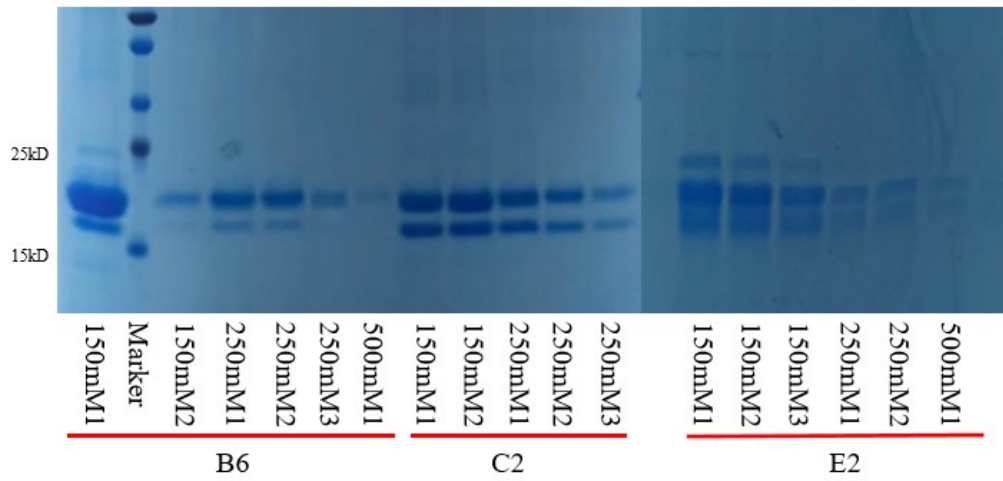

## B Dimmer nanobodies

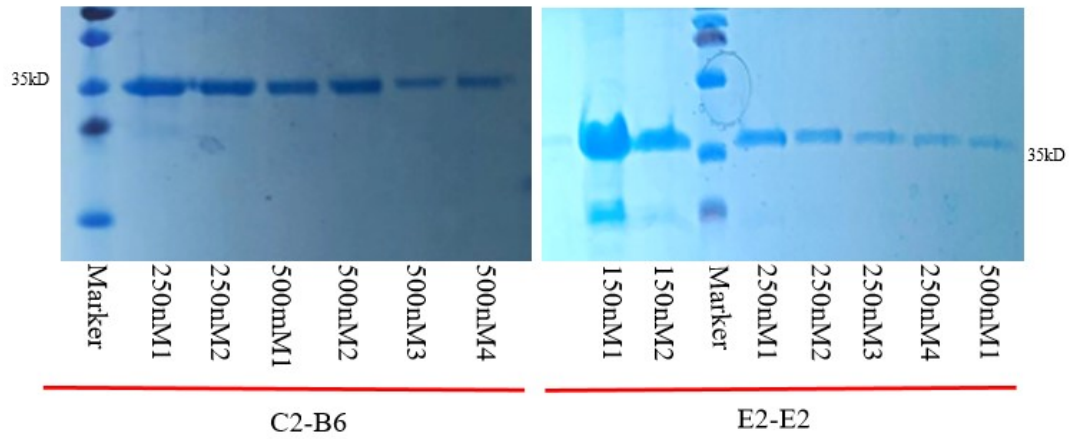

8

9 Figure S2. Prokaryotic synthesis of SARS-CoV-2-specific nanobodies. A B6, C2,  
10 and E2 are VHH monomers. B E2-E2 is a homodimer of E2, and C2-B6 is a heterodimer  
11 of C2 and B6. The two VHH domains are connected by a 3x(GGGGS) flexible linker.

12

13

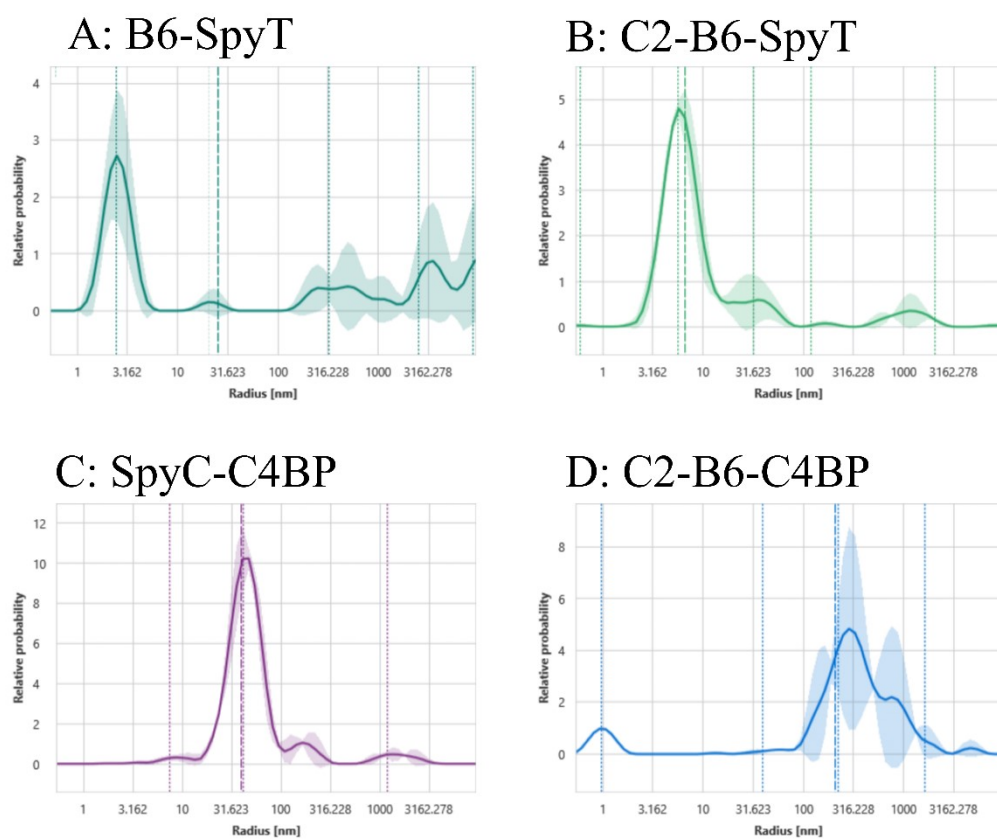

14

15 Figure S3. Analysis of protein hydrodynamic diameter by MicroScale  
 16 Thermophoresis/Temperature-Related Intensity Change (MST/TRIC).

17
